# Supplementary material for: Reversible perovskite-fluorite phase transition in alumina-supported CeFeOx films
Source: Royal Society of Chemistry journal article supplement (doi:10.1039/d2ta06215a), 2023-01-01
Supplement: d2ta06215a1.pdf [file d2ta06215a1.pdf]

## Supporting Information

### Reversible Perovskite-Fluorite Phase Transition in Alumina-Supported CeFeO<sub>x</sub> Films

Kai Shen,<sup>1</sup> Mengjie Fan,<sup>1</sup> Ohhun Kwon,<sup>1</sup> Arthur J. Viescas,<sup>2</sup> Georgia C. Papaefthymiou,<sup>2</sup>  
Raymond J. Gorte,<sup>1</sup> and John M. Vohs<sup>1\*</sup>

<sup>1</sup> Department of Chemical and Biomolecular Engineering  
University of Pennsylvania,  
Philadelphia, PA 19104, USA

<sup>2</sup> Department of Physics  
Villanova University,  
Villanova, PA 19085, USA

\*Corresponding Author email: vohs@seas.upenn.edu

This supporting information file provides the schematic diagram of the coulometric titration system, data for the mass increase of CeFeO<sub>3</sub> on the  $\gamma$ -Al<sub>2</sub>O<sub>3</sub> support, X-ray diffraction (XRD) patterns of reduced CeFeO<sub>x</sub>/ $\gamma$ -Al<sub>2</sub>O<sub>3</sub> after being calcined in air at different temperatures for 12 h, XRD patterns of the CeFeO<sub>x</sub>/ $\gamma$ -Al<sub>2</sub>O<sub>3</sub> sample reduced in 3% H<sub>2</sub>O, 10% H<sub>2</sub>, and 87% He at 1073 K for 12 h, the TEM image of bare  $\gamma$ -Al<sub>2</sub>O<sub>3</sub> annealed at 1173 K for 24 h, and the TEM image of the CeFeO<sub>3</sub>/ $\gamma$ -Al<sub>2</sub>O<sub>3</sub> sample reduced in 10% dry H<sub>2</sub> for 12 h.

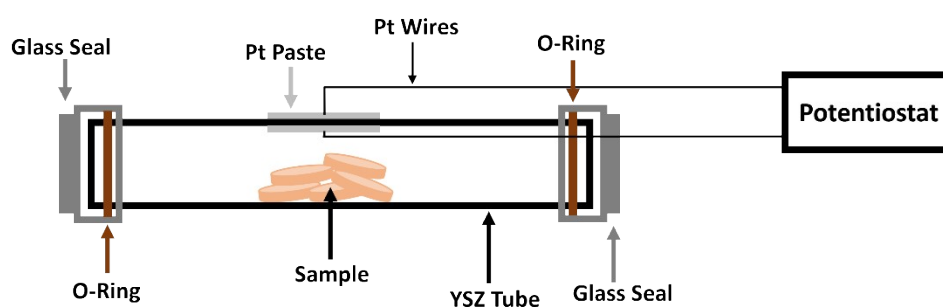

**Fig. Sup1.** Schematic diagram of the coulometric titration apparatus.

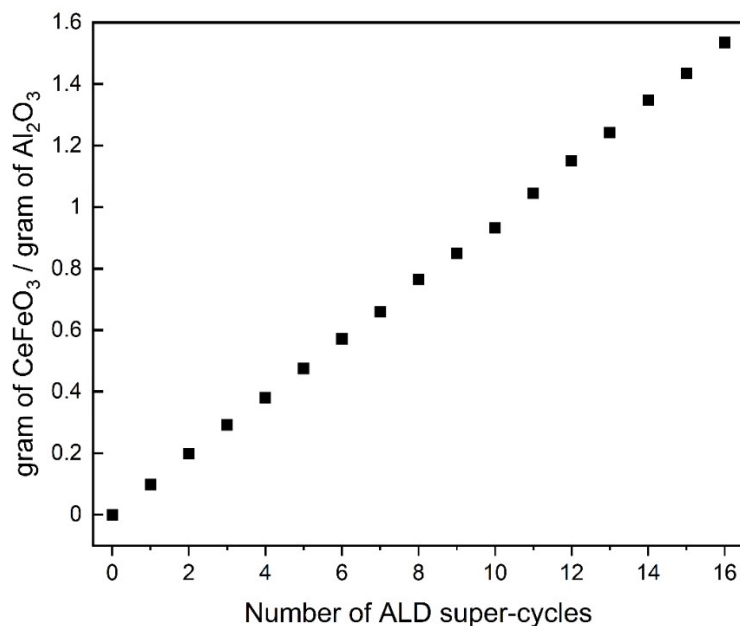

**Fig. Sup2** Plot of the mass increase normalized to the mass of the  $\gamma$ -Al<sub>2</sub>O<sub>3</sub> support as a function of the number of CeFeO<sub>3</sub> ALD super-cycles.

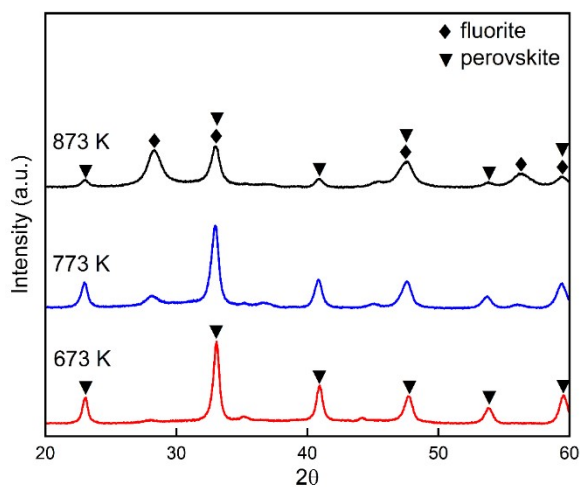

**Fig. Sup3** The XRD patterns of reduced CeFeO<sub>x</sub>/γ-Al<sub>2</sub>O<sub>3</sub> calcined in air at different temperatures for 12 h. The sample was pretreated by 5 redox cycles followed by reduction in hydrogen at 1073K to obtain the reduced state.

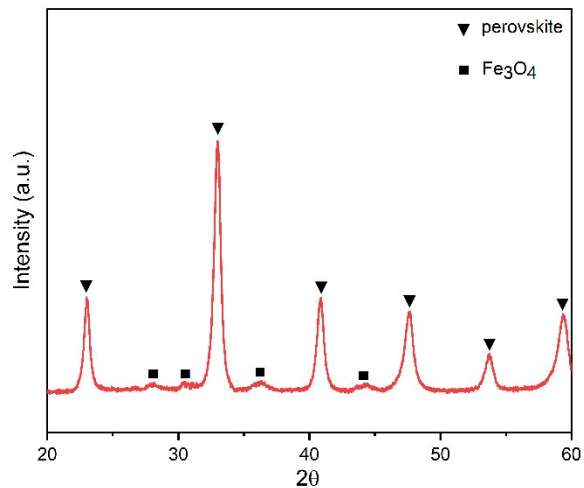

**Fig. Sup4** The XRD pattern of the  $\text{CeFeO}_x/\gamma\text{-Al}_2\text{O}_3$  sample pretreated by 5 redox cycles followed by reduction in 3%  $\text{H}_2\text{O}$ , 10%  $\text{H}_2$ , and 87% He at 1073 K for 12 h.

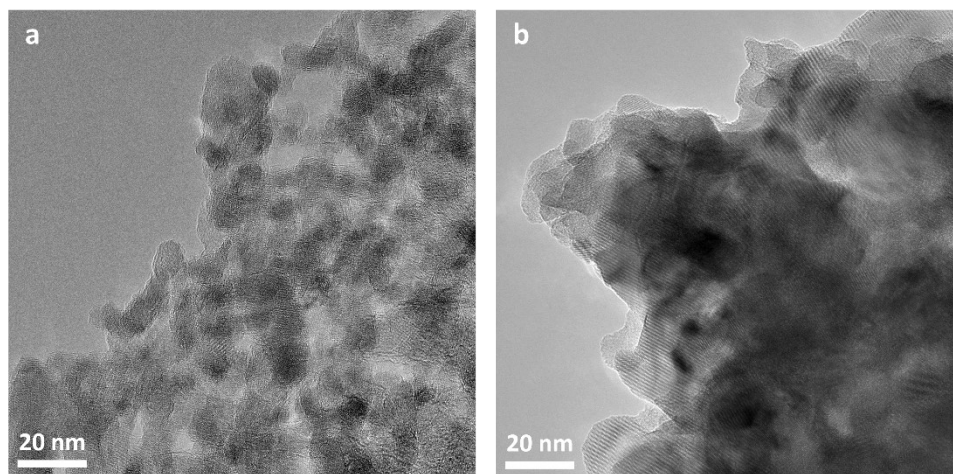

**Fig. Sup5** TEM images of (a) bare  $\gamma\text{-Al}_2\text{O}_3$  annealed at 1173 K for 24 h, and (b) the  $\text{CeFeO}_3/\gamma\text{-Al}_2\text{O}_3$  sample reduced in 10% dry  $\text{H}_2$  for 12 h.
